# Supplementary material
Source: publisher figshare collection journal article supplement (https://springernature.figshare.com/ndownloader/files/14962595)

**
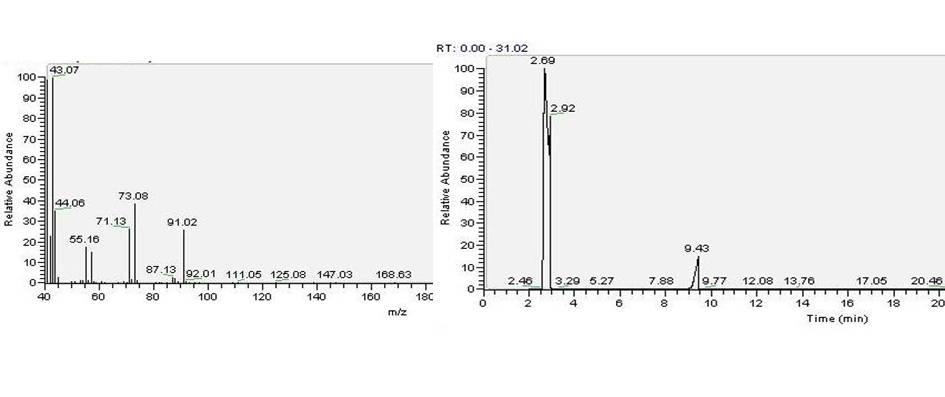
**

Fig. S1. Chromatograph of 1,4-butanediol standard.

Supplement: Supplementary file 1 [file 14962595]
